# Supplementary material for: Metformin Use in Relation to Clinical Outcomes and Hyperinflammatory Syndrome Among COVID-19 Patients With Type 2 Diabetes: A Propensity Score Analysis of a Territory-Wide Cohort
Source: PubMed Central journal article supplement (PMC8935075; doi:10.3389/fendo.2022.810914), 2022-03-07
Supplement: DataSheet_1.pdf [file DataSheet_1.pdf]

Supplementary Figure 1. Distribution of propensity score density of metformin and control groups before weighting (a) and after weighting (b)

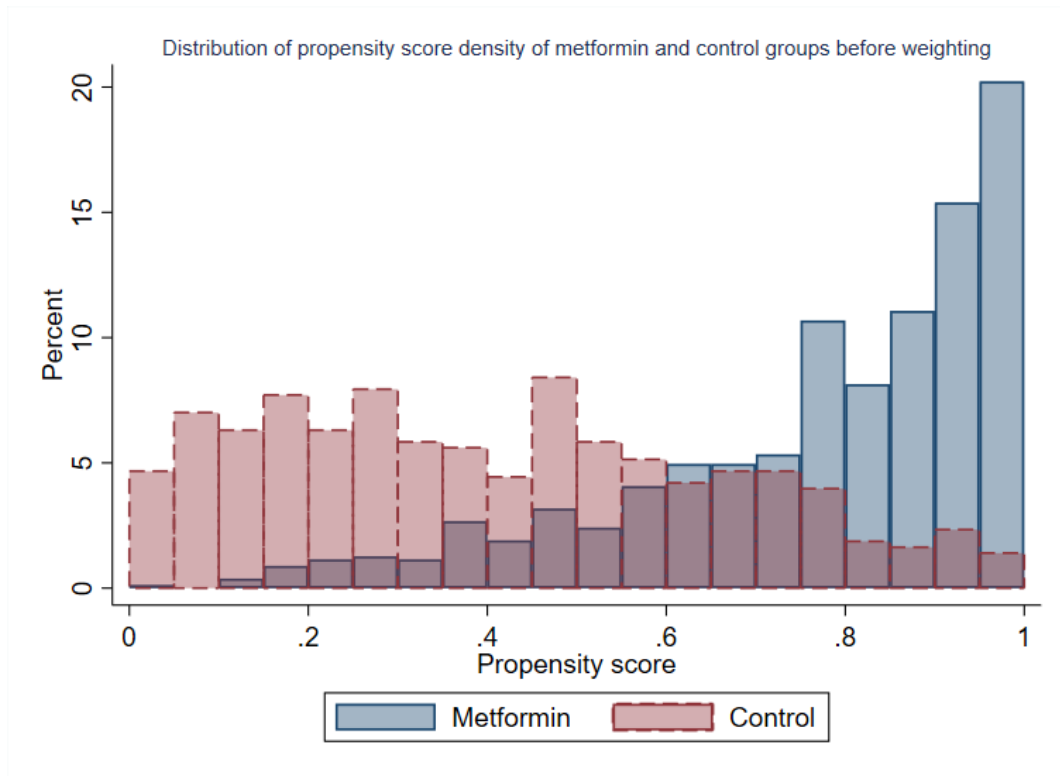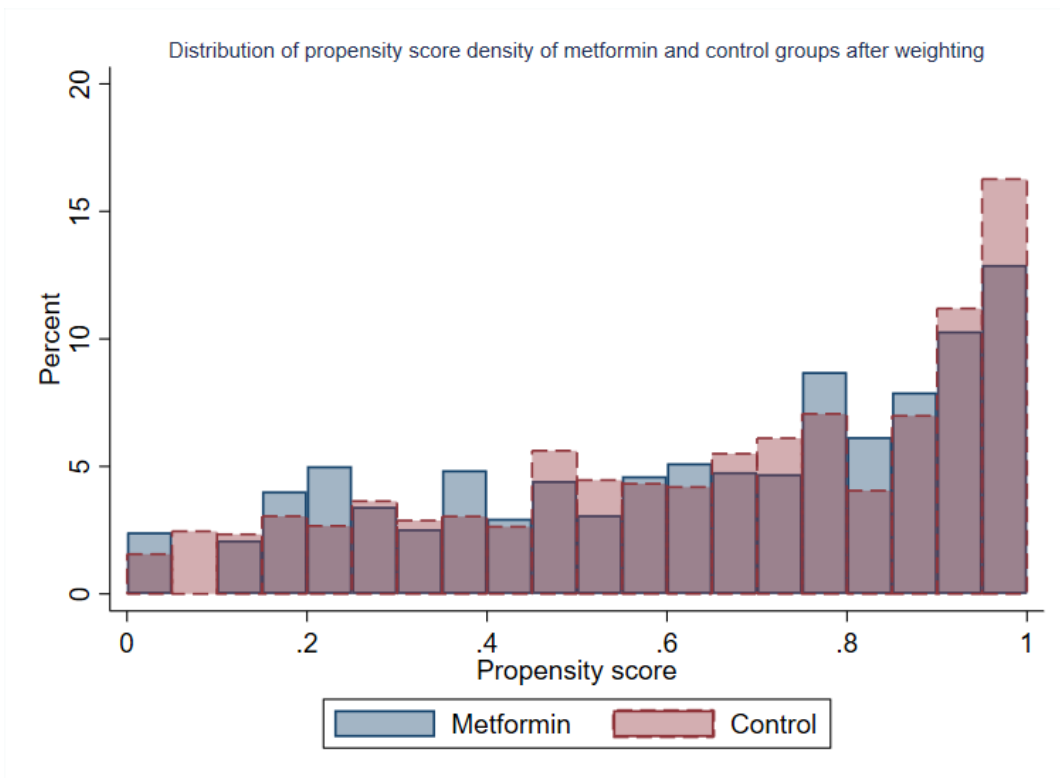

Supplementary Table 1. Unit cost of healthcare services

| Health Service                                                | Cost (HK\$) | Cost (US\$) <sup>†</sup> |
|---------------------------------------------------------------|-------------|--------------------------|
| Hospitalization, per day                                      |             |                          |
| General Ward                                                  | 5,100       | 654                      |
| Intensive Care Unit                                           | 24,400      | 3,128                    |
| Emergency department, per visit                               | 1,230       | 158                      |
| Polymerase chain reaction tests                               | 240         | 31                       |
| Extracorporeal membrane oxygenation (ECMO) catheter insertion | 52,100      | 6,679                    |
| ECMO                                                          | 80,175      | 10,279                   |
| Tracheostomy                                                  | 16,050      | 2,058                    |
| Hemodialysis                                                  | 9,410       | 1,206                    |
| Peritoneal dialysis                                           | 9,410       | 1,206                    |

Data source: Hong Kong SAR Government Gazette and Hospital Authority Ordinance (chapter 113): Public charges – non-eligible persons.

Note: ECMO = Extracorporeal membrane oxygenation

<sup>†</sup>A fixed exchange rate of 1 US\$=7.8 HK\$

Supplementary Table 2. Data completion rates of baseline characteristics before multiple imputation

| Characteristics                         | Total<br>(N = 1,214) | Metformin<br>(N=786) | Control<br>(N=428) |
|-----------------------------------------|----------------------|----------------------|--------------------|
| Age                                     | 100.0% (1,214)       | 100.0% (786)         | 100.0% (428)       |
| Sex                                     | 100.0% (1,214)       | 100.0% (786)         | 100.0% (428)       |
| Pre-existing comorbidities on admission |                      |                      |                    |
| Charlson's Index†                       | 100.0% (1,214)       | 100.0% (786)         | 100.0% (428)       |
| Diabetes mellitus                       | 100.0% (1,214)       | 100.0% (786)         | 100.0% (428)       |
| Hypertension                            | 100.0% (1,214)       | 100.0% (786)         | 100.0% (428)       |
| Chronic heart disease                   | 100.0% (1,214)       | 100.0% (786)         | 100.0% (428)       |
| Chronic lung disease                    | 100.0% (1,214)       | 100.0% (786)         | 100.0% (428)       |
| Chronic kidney disease                  | 100.0% (1,214)       | 100.0% (786)         | 100.0% (428)       |
| Liver disease                           | 100.0% (1,214)       | 100.0% (786)         | 100.0% (428)       |
| Malignancy                              | 100.0% (1,214)       | 100.0% (786)         | 100.0% (428)       |
| Obesity                                 | 100.0% (1,214)       | 100.0% (786)         | 100.0% (428)       |
| Preadmission or in-hospital use         |                      |                      |                    |
| Metformin                               | 100.0% (1,214)       | 100.0% (786)         | 100.0% (428)       |
| GLP1RA                                  | 100.0% (1,214)       | 100.0% (786)         | 100.0% (428)       |
| Insulin                                 | 100.0% (1,214)       | 100.0% (786)         | 100.0% (428)       |
| Oral anti-diabetic drugs                |                      |                      |                    |
| SU                                      | 100.0% (1,214)       | 100.0% (786)         | 100.0% (428)       |
| TZD                                     | 100.0% (1,214)       | 100.0% (786)         | 100.0% (428)       |
| Acarbose                                | 100.0% (1,214)       | 100.0% (786)         | 100.0% (428)       |
| DPP4i                                   | 100.0% (1,214)       | 100.0% (786)         | 100.0% (428)       |
| SGLT2i                                  | 100.0% (1,214)       | 100.0% (786)         | 100.0% (428)       |
| Long-term medications                   |                      |                      |                    |
| ACEI or ARB                             | 100.0% (1,214)       | 100.0% (786)         | 100.0% (428)       |
| Anticoagulant                           | 100.0% (1,214)       | 100.0% (786)         | 100.0% (428)       |
| Antiplatelet                            | 100.0% (1,214)       | 100.0% (786)         | 100.0% (428)       |
| Lipid-lowering agent                    | 100.0% (1,214)       | 100.0% (786)         | 100.0% (428)       |
| NSAID                                   | 100.0% (1,214)       | 100.0% (786)         | 100.0% (428)       |
| In-hospital COVID-19 drug use           |                      |                      |                    |
| Remdesivir                              | 100.0% (1,214)       | 100.0% (786)         | 100.0% (428)       |
| Interferon-β-1b                         | 100.0% (1,214)       | 100.0% (786)         | 100.0% (428)       |
| Dexamethasone                           | 100.0% (1,214)       | 100.0% (786)         | 100.0% (428)       |
| Tocilizumab                             | 100.0% (1,214)       | 100.0% (786)         | 100.0% (428)       |
| ECMO                                    | 100.0% (1,214)       | 100.0% (786)         | 100.0% (428)       |
| Dialysis                                | 100.0% (1,214)       | 100.0% (786)         | 100.0% (428)       |
| ICU admission on admission              | 100.0% (1,214)       | 100.0% (786)         | 100.0% (428)       |
| Admission via emergency department      | 100.0% (1,214)       | 100.0% (786)         | 100.0% (428)       |

|                                    |                |              |              |
|------------------------------------|----------------|--------------|--------------|
| Clinical severity on admission§    | 100.0% (1,214) | 100.0% (786) | 100.0% (428) |
| ARDS                               | 100.0% (1,214) | 100.0% (786) | 100.0% (428) |
| Macrophage activation              | 100.0% (1,214) | 100.0% (786) | 100.0% (428) |
| Haematological dysfunction         | 100.0% (1,214) | 100.0% (786) | 100.0% (428) |
| Coagulopathy                       | 100.0% (1,214) | 100.0% (786) | 100.0% (428) |
| Hepatic inflammation               | 100.0% (1,214) | 100.0% (786) | 100.0% (428) |
| Hyperinflammatory syndrome         | 100.0% (1,214) | 100.0% (786) | 100.0% (428) |
| Laboratory parameters on admission |                |              |              |
| White blood cell                   | 99.9% (1,213)  | 100.0% (786) | 99.8% (427)  |
| Neutrophil                         | 99.4% (1,207)  | 99.6% (783)  | 99.1% (424)  |
| Lymphocyte                         | 99.4% (1,207)  | 99.6% (783)  | 99.1% (424)  |
| Platelet                           | 99.8% (1,212)  | 100.0% (786) | 99.5% (426)  |
| Lactate dehydrogenase              | 97.4% (1,183)  | 97.7% (768)  | 97.0% (415)  |
| Creatine kinase                    | 90.8% (1,102)  | 89.8% (706)  | 92.5% (396)  |
| Total bilirubin                    | 100.0% (1,214) | 100.0% (786) | 100.0% (428) |
| C-reactive protein                 | 97.5% (1,184)  | 97.5% (766)  | 97.7% (418)  |
| Cycle threshold value              | 92.4% (1,122)  | 92.9% (730)  | 91.6% (392)  |
| eGFR                               | 100.0% (1,214) | 100.0% (786) | 100.0% (428) |
| ALP                                | 98.1% (1,191)  | 97.8% (769)  | 98.6% (422)  |
| ALT                                | 100.0% (1,214) | 100.0% (786) | 100.0% (428) |
| Hemoglobin                         | 99.9% (1,213)  | 100.0% (786) | 99.8% (427)  |
| Prothrombin time                   | 43.8% (532)    | 44.0% (346)  | 43.5% (186)  |
| Random glucose                     | 53.3% (647)    | 54.8% (431)  | 50.5% (216)  |
| Hemoglobin A1c                     | 27.2% (330)    | 31.8% (250)  | 18.7% (80)   |

---

Note: ACEI = Angiotensin converting enzyme inhibitor; ALP = Alkaline phosphatase; ALT = Alanine transaminase; ARB = Angiotensin receptor blockers; AST = Aspartate aminotransferase; ECMO = Extracorporeal membrane oxygenation; eGFR= Estimated glomerular filtration rate; ICU = Intensive Care Unit; NSAID = Nonsteroidal anti-inflammatory drugs

† The calculation of Charlson Index does not include Acquired Immune Deficiency Syndrome (AIDS).

§ Clinical severity is classified according to WHO Clinical Progression Scale



|                                                                                                         |     |        |        |                  |       |    |    |        |                  |
|---------------------------------------------------------------------------------------------------------|-----|--------|--------|------------------|-------|----|----|--------|------------------|
| Clinical improvement on WHO clinical progression scale by $\geq 1$ score                                | 763 | 0.9707 | 4.850  | (4.512, 5.207)   | 15732 | 15 | 20 | 4.531  | (4.277, 4.794)   |
| Clinical improvement on WHO clinical progression scale by $\geq 2$ scores                               | 758 | 0.9644 | 4.674  | (4.347, 5.019)   | 16218 | 15 | 21 | 4.150  | (3.917, 4.394)   |
| Hospital discharge (score $\leq 3$ )                                                                    | 752 | 0.9567 | 4.594  | (4.272, 4.934)   | 16369 | 15 | 21 | 3.855  | (3.635, 4.080)   |
| Recovery (score $\leq 4$ )                                                                              | 119 | 0.8561 | 2.164  | (1.792, 2.589)   | 5500  | 27 | 40 | 1.861  | (1.643, 2.094)   |
| Viral clearance (first negative PCR result)                                                             | 681 | 0.9927 | 11.480 | (10.634, 12.376) | 5932  | 8  | 9  | 11.020 | (10.365, 11.702) |
| Low viral load (Ct value $\geq 35$ )                                                                    | 238 | 0.3115 | 1.935  | (1.697, 2.197)   | 12301 | 13 | 16 | 1.938  | (1.753, 2.135)   |
| Low viral load (Ct value $\geq 30$ )                                                                    | 601 | 0.8513 | 7.766  | (7.157, 8.412)   | 7739  | 9  | 11 | 7.440  | (6.974, 7.921)   |
| Seroconversion (first Ct value $\geq 30$ or IgG antibody positivity)                                    | 738 | 0.9389 | 8.137  | (7.560, 8.746)   | 9070  | 11 | 13 | 7.805  | (7.363, 8.263)   |
| IgG antibody                                                                                            | 702 | 0.8931 | 7.242  | (6.716, 7.798)   | 9694  | 10 | 12 | 7.074  | (6.665, 7.500)   |
| In-hospital death or invasive mechanical ventilation (score $\geq 7$ )                                  | 80  | 0.1026 | 0.604  | (0.479, 0.752)   | 13238 | 14 | 17 | 0.886  | (0.762, 1.020)   |
| In-hospital death or invasive mechanical ventilation (score $\geq 7$ ) or intensive care unit admission | 33  | 0.0484 | 0.296  | (0.204, 0.416)   | 11148 | 14 | 16 | 0.443  | (0.347, 0.554)   |
| In-hospital death, invasive mechanical ventilation, vasopressors, dialysis, or ECMO (score $\geq 9$ )   | 39  | 0.0497 | 0.245  | (0.175, 0.336)   | 15886 | 15 | 20 | 0.334  | (0.271, 0.407)   |
| In-hospital death (score = 10)                                                                          | 28  | 0.0356 | 0.171  | (0.114, 0.247)   | 16369 | 15 | 21 | 0.264  | (0.209, 0.328)   |
| Acidosis                                                                                                | 9   | 0.0115 | 0.056  | (0.025, 0.106)   | 16189 | 15 | 21 | 0.160  | (0.117, 0.213)   |
| Hypoglycemia                                                                                            | 35  | 0.0446 | 0.217  | (0.151, 0.301)   | 16148 | 15 | 21 | 0.131  | (0.093, 0.179)   |
| ARDS                                                                                                    | 57  | 0.0737 | 0.413  | (0.313, 0.535)   | 13808 | 14 | 18 | 0.553  | (0.462, 0.654)   |
| Macrophage activation                                                                                   | 239 | 0.3041 | 2.257  | (1.980, 2.562)   | 10589 | 11 | 13 | 2.505  | (2.271, 2.753)   |
| Haematological dysfunction                                                                              | 205 | 0.2752 | 2.228  | (1.933, 2.555)   | 9201  | 11 | 12 | 2.791  | (2.514, 3.087)   |
| Coagulopathy                                                                                            | 48  | 0.0613 | 0.341  | (0.251, 0.452)   | 14089 | 14 | 18 | 0.358  | (0.287, 0.440)   |
| Hepatic inflammation                                                                                    | 170 | 0.2304 | 1.622  | (1.388, 1.886)   | 10478 | 12 | 14 | 1.641  | (1.457, 1.838)   |
| Hyperinflammatory syndrome                                                                              | 344 | 0.4879 | 4.998  | (4.484, 5.555)   | 6883  | 8  | 10 | 5.591  | (5.137, 6.074)   |
| <b>Control (N = 428)</b>                                                                                |     |        |        |                  |       |    |    |        |                  |
| Clinical improvement on WHO clinical progression scale by $\geq 1$ score                                | 344 | 0.8037 | 2.787  | (2.501, 3.098)   | 12341 | 18 | 29 | 3.612  | (3.406, 3.825)   |
| Clinical improvement on WHO clinical progression scale by $\geq 2$ scores                               | 339 | 0.7921 | 2.532  | (2.270, 2.817)   | 13386 | 18 | 31 | 3.361  | (3.168, 3.560)   |
| Hospital discharge (score $\leq 3$ )                                                                    | 328 | 0.7664 | 2.400  | (2.147, 2.674)   | 13666 | 19 | 32 | 3.275  | (3.087, 3.472)   |
| Recovery (score $\leq 4$ )                                                                              | 104 | 0.6012 | 1.190  | (0.973, 1.442)   | 8737  | 35 | 51 | 1.401  | (1.214, 1.604)   |
| Viral clearance (first negative PCR result)                                                             | 343 | 0.9050 | 8.902  | (7.985, 9.896)   | 3853  | 9  | 10 | 10.272 | (9.680, 10.889)  |
| Low viral load (Ct value $\geq 35$ )                                                                    | 148 | 0.3549 | 1.637  | (1.384, 1.923)   | 9039  | 16 | 22 | 1.994  | (1.816, 2.182)   |
| Low viral load (Ct value $\geq 30$ )                                                                    | 307 | 0.7852 | 6.047  | (5.389, 6.763)   | 5077  | 12 | 13 | 7.842  | (7.370, 8.335)   |

|                                                                                                        |     |        |       |                |       |    |    |       |                |
|--------------------------------------------------------------------------------------------------------|-----|--------|-------|----------------|-------|----|----|-------|----------------|
| Seroconversion (first Ct value $\geq$ 30 or IgG antibody positivity)                                   | 368 | 0.8598 | 6.656 | (5.993, 7.372) | 5529  | 12 | 14 | 8.099 | (7.649, 8.563) |
| IgG antibody                                                                                           | 343 | 0.8014 | 5.752 | (5.159, 6.394) | 5963  | 11 | 14 | 6.464 | (6.090, 6.853) |
| In-hospital death or invasive mechanical ventilation (score $\geq$ 7)                                  | 159 | 0.3795 | 2.058 | (1.750, 2.404) | 7727  | 14 | 18 | 1.278 | (1.138, 1.426) |
| In-hospital death or invasive mechanical ventilation (score $\geq$ 7) or intensive care unit admission | 57  | 0.2050 | 1.235 | (0.935, 1.600) | 4617  | 13 | 17 | 0.829 | (0.703, 0.966) |
| In-hospital death, invasive mechanical ventilation, vasopressors, dialysis, or ECMO (score $\geq$ 9)   | 102 | 0.2400 | 0.766 | (0.624, 0.930) | 13319 | 18 | 31 | 0.660 | (0.574, 0.751) |
| In-hospital death (score = 10)                                                                         | 87  | 0.2033 | 0.637 | (0.510, 0.785) | 13666 | 19 | 32 | 0.540 | (0.464, 0.622) |
| Acidosis                                                                                               | 4   | 0.0093 | 0.029 | (0.008, 0.075) | 13578 | 19 | 32 | 0.020 | (0.007, 0.040) |
| Hypoglycemia                                                                                           | 10  | 0.0234 | 0.074 | (0.035, 0.136) | 13562 | 19 | 32 | 0.050 | (0.029, 0.079) |
| ARDS                                                                                                   | 73  | 0.1772 | 0.761 | (0.597, 0.957) | 9589  | 15 | 23 | 0.465 | (0.387, 0.552) |
| Macrophage activation                                                                                  | 193 | 0.4509 | 3.105 | (2.683, 3.576) | 6215  | 9  | 15 | 2.736 | (2.506, 2.977) |
| Haematological dysfunction                                                                             | 207 | 0.5335 | 5.143 | (4.466, 5.893) | 4025  | 8  | 10 | 2.977 | (2.712, 3.256) |
| Coagulopathy                                                                                           | 67  | 0.1576 | 0.648 | (0.502, 0.823) | 10340 | 16 | 24 | 0.367 | (0.301, 0.443) |
| Hepatic inflammation                                                                                   | 181 | 0.4726 | 3.962 | (3.406, 4.584) | 4568  | 9  | 12 | 3.148 | (2.877, 3.437) |
| Hyperinflammatory syndrome                                                                             | 227 | 0.6431 | 7.901 | (6.907, 8.999) | 2873  | 6  | 8  | 5.983 | (5.546, 6.440) |

Note: ARDS = Acute respiratory distress syndrome; CI = confidence interval; Ct = cycle threshold; IgG = Immunoglobulin G; PCR = polymerase chain reaction

\* 95% CI of incidence rates were constructed by Poisson distribution.

Supplementary Table 4. Sensitivity analysis on the outcomes

|                                                                                            | Before weighting |             | After weighting      |               |         |
|--------------------------------------------------------------------------------------------|------------------|-------------|----------------------|---------------|---------|
|                                                                                            | Metformin        | Control     | Metformin vs Control |               |         |
|                                                                                            | % (N)            | % (N)       | OR†                  | 95% CI        | P-value |
| <b>Clinical improvement on WHO clinical progression scale by <math>\geq 1</math> score</b> |                  |             |                      |               |         |
| Removing hospital discharge as censoring criteria                                          | 97.1% (786)      | 80.4% (428) | 2.74                 | (1.31, 5.71)  | 0.009   |
| At most 90 days of follow-up period                                                        | 97.1% (786)      | 80.4% (428) | 2.74                 | (1.31, 5.71)  | 0.009   |
| <b>Hospital discharge (score <math>\leq 3</math>)</b>                                      |                  |             |                      |               |         |
| Removing hospital discharge as censoring criteria                                          | 95.7% (786)      | 76.6% (428) | 2.26                 | (1.24, 4.12)  | 0.009   |
| At most 90 days of follow-up period                                                        | 95.7% (786)      | 76.6% (428) | 2.26                 | (1.24, 4.12)  | 0.009   |
| <b>Recovery (score <math>\leq 4</math>)</b>                                                |                  |             |                      |               |         |
| Removing hospital discharge as censoring criteria                                          | 85.6% (139)      | 60.1% (173) | 2.54                 | (1.34, 4.80)  | 0.005   |
| At most 90 days of follow-up period                                                        | 85.6% (139)      | 60.1% (173) | 2.54                 | (1.34, 4.80)  | 0.005   |
| <b>In-hospital death (score = 10)</b>                                                      |                  |             |                      |               |         |
| Removing hospital discharge as censoring criteria                                          | 1.1% (786)       | 0.9% (428)  | 0.64                 | (0.43, 0.96)  | 0.031   |
| At most 90 days of follow-up period                                                        | 1.1% (786)       | 0.9% (428)  | 0.64                 | (0.43, 0.95)  | 0.028   |
| <b>Acidosis</b>                                                                            |                  |             |                      |               |         |
| Removing hospital discharge as censoring criteria                                          | 4.5% (784)       | 2.3% (428)  | 6.82                 | (2.56, 18.18) | <0.001  |
| At most 90 days of follow-up period                                                        | 4.5% (784)       | 2.3% (428)  | 6.82                 | (2.56, 18.18) | <0.001  |
| <b>Macrophage activation</b>                                                               |                  |             |                      |               |         |
| Removing hospital discharge as censoring criteria                                          | 27.5% (745)      | 53.4% (388) | 0.74                 | (0.59, 0.93)  | 0.009   |
| At most 90 days of follow-up period                                                        | 27.5% (745)      | 53.4% (388) | 0.74                 | (0.59, 0.93)  | 0.009   |
| <b>Haematological dysfunction</b>                                                          |                  |             |                      |               |         |
| Removing hospital discharge as censoring criteria                                          | 6.1% (783)       | 15.8% (425) | 0.77                 | (0.55, 1.10)  | 0.142   |
| At most 90 days of follow-up period                                                        | 6.1% (783)       | 15.8% (425) | 0.77                 | (0.55, 1.10)  | 0.142   |
| <b>Coagulopathy</b>                                                                        |                  |             |                      |               |         |
| Removing hospital discharge as censoring criteria                                          | 23.0% (738)      | 47.3% (383) | 0.81                 | (0.58, 1.14)  | 0.234   |
| At most 90 days of follow-up period                                                        | 23.0% (738)      | 47.3% (383) | 0.81                 | (0.58, 1.14)  | 0.234   |
| <b>Hepatic inflammation</b>                                                                |                  |             |                      |               |         |
| Removing hospital discharge as censoring criteria                                          | 48.8% (705)      | 64.3% (353) | 0.50                 | (0.38, 0.65)  | <0.001  |
| At most 90 days of follow-up period                                                        | 48.8% (705)      | 64.3% (353) | 0.50                 | (0.38, 0.65)  | <0.001  |
| <b>Hyperinflammatory syndrome</b>                                                          |                  |             |                      |               |         |
| Removing hospital discharge as censoring criteria                                          | 19.2% (682)      | 32.7% (278) | 0.71                 | (0.53, 0.95)  | 0.021   |
| At most 90 days of follow-up period                                                        | 19.1% (682)      | 32.7% (278) | 0.71                 | (0.53, 0.95)  | 0.021   |

Note: CI = confidence interval; Ct = cycle threshold; OR = odds ratio; IgG = Immunoglobulin G; IPTW= Inverse probability of treatment weighting

† OR >1 (or <1) indicates metformin group was associated with better (worse) clinical improvement, higher proportions of hospital discharge or recovery, higher (lower) risk of composite outcomes, compared to the control group



Supplementary Table 5. Subgroup analysis on the outcomes

|                                                                                            | Before weighting |             | After weighting      |               |         |
|--------------------------------------------------------------------------------------------|------------------|-------------|----------------------|---------------|---------|
|                                                                                            | Metformin        | Control     | Metformin vs Control |               |         |
|                                                                                            | % (N)            | % (N)       | OR†                  | 95% CI        | P-value |
| <b>Clinical improvement on WHO clinical progression scale by <math>\geq 1</math> score</b> |                  |             |                      |               |         |
| Overall                                                                                    | 97.1% (786)      | 80.4% (428) | 2.74                 | (1.31, 5.71)  | 0.009   |
| Age $\leq 65$                                                                              | 99.5% (418)      | 94.5% (183) | 4.57                 | (1.19, 17.51) | 0.027   |
| Age $> 65$                                                                                 | 94.3% (368)      | 69.8% (245) | 2.75                 | (1.24, 6.11)  | 0.015   |
| Male                                                                                       | 96.9% (423)      | 77.2% (237) | 4.55                 | (1.43, 14.51) | 0.013   |
| Female                                                                                     | 97.2% (363)      | 84.3% (191) | 1.26                 | (0.55, 2.89)  | 0.579   |
| Without invasive mechanical ventilation or ECMO                                            | 97.1% (780)      | 80.0% (419) | 2.67                 | (1.28, 5.55)  | 0.010   |
| With invasive mechanical ventilation or ECMO                                               | 100.0% (6)       | 100.0% (9)  | NA                   | NA            | NA      |
| Without ICU admission                                                                      | 98.1% (682)      | 86.3% (278) | 2.19                 | (0.79, 6.04)  | 0.125   |
| With ICU admission                                                                         | 90.4% (104)      | 69.3% (150) | 5.12                 | (2.73, 9.60)  | <0.001  |
| Without concomitant use of insulin                                                         | 99.7% (369)      | 91.4% (151) | 5.14                 | (0.98, 26.92) | 0.052   |
| With concomitant use of insulin                                                            | 94.7% (417)      | 74.4% (277) | 2.50                 | (1.12, 5.60)  | 0.027   |
| Without concomitant use of SU                                                              | 98.1% (413)      | 80.6% (371) | 4.33                 | (2.27, 8.28)  | <0.001  |
| With concomitant use of SU                                                                 | 96.0% (373)      | 78.9% (57)  | 1.94                 | (0.56, 6.66)  | 0.279   |
| Without concomitant use of remdesivir                                                      | 98.6% (579)      | 81.1% (307) | 4.78                 | (1.33, 17.09) | 0.018   |
| With concomitant use of remdesivir                                                         | 92.8% (207)      | 78.5% (121) | 1.14                 | (0.55, 2.38)  | 0.717   |
| Without concomitant use of interferon- $\beta$ -1b                                         | 98.6% (283)      | 88.5% (122) | 1.50                 | (0.37, 6.17)  | 0.561   |
| With concomitant use of interferon- $\beta$ -1b                                            | 96.2% (503)      | 77.1% (306) | 3.21                 | (1.36, 7.56)  | 0.010   |
| Without concomitant use of dexamethasone                                                   | 99.8% (445)      | 93.1% (173) | 6.58                 | (1.16, 37.46) | 0.034   |
| With concomitant use of dexamethasone                                                      | 93.5% (341)      | 71.8% (255) | 3.00                 | (1.45, 6.23)  | 0.004   |
| <b>Hospital discharge (score <math>\leq 3</math>)</b>                                      |                  |             |                      |               |         |
| Overall                                                                                    | 95.7% (786)      | 76.6% (428) | 2.26                 | (1.24, 4.12)  | 0.009   |
| Age $\leq 65$                                                                              | 98.3% (418)      | 92.9% (183) | 1.82                 | (0.77, 4.28)  | 0.170   |
| Age $> 65$                                                                                 | 92.7% (368)      | 64.5% (245) | 2.41                 | (1.21, 4.82)  | 0.015   |
| Male                                                                                       | 96.0% (423)      | 72.6% (237) | 3.45                 | (1.41, 8.44)  | 0.008   |
| Female                                                                                     | 95.3% (363)      | 81.7% (191) | 1.14                 | (0.55, 2.34)  | 0.722   |
| Without invasive mechanical ventilation or ECMO                                            | 95.9% (780)      | 77.1% (419) | 2.29                 | (1.22, 4.31)  | 0.012   |
| With invasive mechanical ventilation or ECMO                                               | 66.7% (6)        | 55.6% (9)   | 5.30                 | (1.02, 27.56) | 0.047   |
| Without ICU admission                                                                      | 97.2% (682)      | 84.5% (278) | 2.05                 | (0.83, 5.06)  | 0.116   |
| With ICU admission                                                                         | 85.6% (104)      | 62.0% (150) | 3.22                 | (1.86, 5.55)  | <0.001  |
| Without concomitant use of insulin                                                         | 98.9% (369)      | 90.7% (151) | 2.84                 | (0.93, 8.67)  | 0.067   |
| With concomitant use of insulin                                                            | 92.8% (417)      | 69.0% (277) | 2.12                 | (1.09, 4.14)  | 0.028   |
| Without concomitant use of SU                                                              | 96.9% (413)      | 76.5% (371) | 3.00                 | (1.87, 4.83)  | <0.001  |
| With concomitant use of SU                                                                 | 94.4% (373)      | 77.2% (57)  | 1.70                 | (0.57, 5.10)  | 0.330   |
| Without concomitant use of remdesivir                                                      | 97.6% (579)      | 79.2% (307) | 3.66                 | (1.32, 10.15) | 0.015   |
| With concomitant use of remdesivir                                                         | 90.3% (207)      | 70.2% (121) | 1.15                 | (0.63, 2.09)  | 0.653   |
| Without concomitant use of interferon- $\beta$ -1b                                         | 97.9% (283)      | 86.9% (122) | 1.32                 | (0.41, 4.22)  | 0.628   |
| With concomitant use of interferon- $\beta$ -1b                                            | 94.4% (503)      | 72.5% (306) | 2.56                 | (1.27, 5.17)  | 0.010   |
| Without concomitant use of dexamethasone                                                   | 99.1% (445)      | 93.1% (173) | 2.68                 | (0.91, 7.90)  | 0.073   |

|                                                 |             |             |       |                |        |
|-------------------------------------------------|-------------|-------------|-------|----------------|--------|
| With concomitant use of dexamethasone           | 91.2% (341) | 65.5% (255) | 2.61  | (1.43, 4.76)   | 0.003  |
| <b>Recovery (score ≤ 4)</b>                     |             |             |       |                |        |
| Overall                                         | 85.6% (139) | 60.1% (173) | 2.54  | (1.34, 4.80)   | 0.005  |
| Age ≤ 65                                        | 94.1% (51)  | 81.0% (58)  | 2.56  | (0.80, 8.14)   | 0.112  |
| Age > 65                                        | 80.7% (88)  | 49.6% (115) | 3.08  | (1.47, 6.43)   | 0.004  |
| Male                                            | 86.4% (88)  | 55.3% (114) | 3.71  | (2.07, 6.67)   | <0.001 |
| Female                                          | 84.3% (51)  | 69.5% (59)  | 1.29  | (0.41, 4.11)   | 0.656  |
| Without invasive mechanical ventilation or ECMO | 86.5% (133) | 60.4% (164) | 2.42  | (1.24, 4.72)   | 0.010  |
| With invasive mechanical ventilation or ECMO    | 66.7% (6)   | 55.6% (9)   | 5.30  | (1.02, 27.56)  | 0.047  |
| Without ICU admission                           | 85.7% (35)  | 47.8% (23)  | 1.28  | (0.30, 5.42)   | 0.732  |
| With ICU admission                              | 85.6% (104) | 62.0% (150) | 3.22  | (1.86, 5.55)   | <0.001 |
| Without concomitant use of insulin              | 93.8% (16)  | 55.6% (9)   | 17.46 | (1.77, 172.70) | 0.014  |
| With concomitant use of insulin                 | 84.6% (123) | 60.4% (164) | 2.29  | (1.19, 4.38)   | 0.014  |
| Without concomitant use of SU                   | 86.0% (57)  | 60.6% (155) | 3.16  | (1.68, 5.93)   | <0.001 |
| With concomitant use of SU                      | 85.4% (82)  | 55.6% (18)  | 1.83  | (0.59, 5.67)   | 0.289  |
| Without concomitant use of remdesivir           | 88.1% (67)  | 62.1% (95)  | 5.28  | (2.19, 12.72)  | <0.001 |
| With concomitant use of remdesivir              | 83.3% (72)  | 57.7% (78)  | 1.47  | (0.64, 3.35)   | 0.354  |
| Without concomitant use of interferon-β-1b      | 89.7% (29)  | 50.0% (26)  | 1.63  | (0.33, 8.00)   | 0.538  |
| With concomitant use of interferon-β-1b         | 84.5% (110) | 61.9% (147) | 3.05  | (1.78, 5.21)   | <0.001 |
| Without concomitant use of dexamethasone        | 95.7% (23)  | 68.4% (19)  | 3.84  | (0.54, 27.35)  | 0.178  |
| With concomitant use of dexamethasone           | 83.6% (116) | 59.1% (154) | 2.56  | (1.30, 5.05)   | 0.008  |
| <b>In-hospital death (score = 10)</b>           |             |             |       |                |        |
| Overall                                         | 3.6% (786)  | 20.3% (428) | 0.41  | (0.22, 0.80)   | 0.010  |
| Age ≤ 65                                        | 0.7% (418)  | 6.0% (183)  | 0.36  | (0.12, 1.10)   | 0.074  |
| Age > 65                                        | 6.8% (368)  | 31.0% (245) | 0.40  | (0.19, 0.84)   | 0.017  |
| Male                                            | 3.5% (423)  | 24.1% (237) | 0.25  | (0.09, 0.70)   | 0.010  |
| Female                                          | 3.6% (363)  | 15.7% (191) | 0.92  | (0.43, 2.00)   | 0.838  |
| Without invasive mechanical ventilation or ECMO | 3.3% (780)  | 19.8% (419) | 0.40  | (0.20, 0.81)   | 0.013  |
| With invasive mechanical ventilation or ECMO    | 33.3% (6)   | 44.4% (9)   | 0.19  | (0.04, 0.98)   | 0.047  |
| Without ICU admission                           | 2.3% (682)  | 14.7% (278) | 0.48  | (0.19, 1.24)   | 0.125  |
| With ICU admission                              | 11.5% (104) | 30.7% (150) | 0.26  | (0.15, 0.47)   | <0.001 |
| Without concomitant use of insulin              | 0.5% (369)  | 9.3% (151)  | 0.24  | (0.06, 0.97)   | 0.045  |
| With concomitant use of insulin                 | 6.2% (417)  | 26.4% (277) | 0.45  | (0.22, 0.93)   | 0.033  |
| Without concomitant use of SU                   | 2.7% (413)  | 20.5% (371) | 0.29  | (0.17, 0.49)   | <0.001 |
| With concomitant use of SU                      | 4.6% (373)  | 19.3% (57)  | 0.56  | (0.17, 1.83)   | 0.322  |
| Without concomitant use of remdesivir           | 1.7% (579)  | 19.2% (307) | 0.22  | (0.07, 0.73)   | 0.016  |
| With concomitant use of remdesivir              | 8.7% (207)  | 23.1% (121) | 1.04  | (0.54, 2.00)   | 0.899  |
| Without concomitant use of interferon-β-1b      | 1.8% (283)  | 10.7% (122) | 0.87  | (0.26, 2.95)   | 0.818  |
| With concomitant use of interferon-β-1b         | 4.6% (503)  | 24.2% (306) | 0.35  | (0.16, 0.75)   | 0.009  |
| Without concomitant use of dexamethasone        | 0.2% (445)  | 6.4% (173)  | 0.16  | (0.03, 0.94)   | 0.042  |
| With concomitant use of dexamethasone           | 7.9% (341)  | 29.8% (255) | 0.38  | (0.20, 0.72)   | 0.004  |
| <b>Acidosis</b>                                 |             |             |       |                |        |
| Overall                                         | 1.1% (786)  | 0.9% (428)  | 6.82  | (2.56, 18.18)  | <0.001 |

|                                                 |            |            |       |                |        |
|-------------------------------------------------|------------|------------|-------|----------------|--------|
| Age ≤ 65                                        | 1.2% (418) | 0.0% (183) | NA    | NA             | NA     |
| Age > 65                                        | 1.1% (368) | 1.6% (245) | 6.06  | (2.11, 17.40)  | <0.001 |
| Male                                            | 1.7% (423) | 1.3% (237) | 2.48  | (0.81, 7.57)   | 0.109  |
| Female                                          | 0.6% (363) | 0.5% (191) | 26.15 | (3.94, 173.41) | <0.001 |
| Without invasive mechanical ventilation or ECMO | 0.9% (780) | 1.0% (419) | 2.06  | (0.73, 5.86)   | 0.174  |
| With invasive mechanical ventilation or ECMO    | 33.3% (6)  | 0.0% (9)   | NA    | NA             | NA     |
| Without ICU admission                           | 0.0% (682) | 0.0% (278) | NA    | NA             | NA     |
| With ICU admission                              | 8.7% (104) | 2.7% (150) | 7.43  | (2.76, 19.99)  | <0.001 |
| Without concomitant use of insulin              | 0.0% (369) | 0.0% (151) | NA    | NA             | NA     |
| With concomitant use of insulin                 | 2.2% (417) | 1.4% (277) | 7.74  | (2.82, 21.25)  | <0.001 |
| Without concomitant use of SU                   | 1.5% (413) | 0.8% (371) | 8.38  | (2.69, 26.08)  | <0.001 |
| With concomitant use of SU                      | 0.8% (373) | 1.8% (57)  | 3.16  | (0.51, 19.42)  | 0.214  |
| Without concomitant use of remdesivir           | 0.9% (579) | 1.3% (307) | 6.19  | (2.25, 17.01)  | <0.001 |
| With concomitant use of remdesivir              | 1.9% (207) | 0.0% (121) | NA    | NA             | NA     |
| Without concomitant use of interferon-β-1b      | 0.7% (283) | 0.8% (122) | 0.91  | (0.13, 6.19)   | 0.923  |
| With concomitant use of interferon-β-1b         | 1.4% (503) | 1.0% (306) | 10.28 | (3.40, 31.10)  | <0.001 |
| Without concomitant use of dexamethasone        | 0.4% (445) | 0.6% (173) | 1.62  | (0.26, 10.02)  | 0.603  |
| With concomitant use of dexamethasone           | 2.1% (341) | 1.2% (255) | 9.16  | (2.98, 28.16)  | <0.001 |

#### Macrophage activation

|                                                 |             |             |      |               |        |
|-------------------------------------------------|-------------|-------------|------|---------------|--------|
| Overall                                         | 30.4% (786) | 45.1% (428) | 0.74 | (0.59, 0.93)  | 0.009  |
| Age ≤ 65                                        | 28.5% (418) | 36.6% (183) | 0.72 | (0.52, 0.98)  | 0.040  |
| Age > 65                                        | 32.6% (368) | 51.4% (245) | 0.77 | (0.56, 1.06)  | 0.109  |
| Male                                            | 38.3% (423) | 52.7% (237) | 0.79 | (0.58, 1.07)  | 0.129  |
| Female                                          | 21.2% (363) | 35.6% (191) | 0.67 | (0.45, 1.00)  | 0.050  |
| Without invasive mechanical ventilation or ECMO | 30.1% (780) | 44.4% (419) | 0.69 | (0.55, 0.87)  | 0.002  |
| With invasive mechanical ventilation or ECMO    | 66.7% (6)   | 77.8% (9)   | 3.42 | (0.43, 27.09) | 0.244  |
| Without ICU admission                           | 25.8% (682) | 28.1% (278) | 0.78 | (0.58, 1.05)  | 0.104  |
| With ICU admission                              | 60.6% (104) | 76.7% (150) | 0.42 | (0.26, 0.68)  | <0.001 |
| Without concomitant use of insulin              | 15.2% (369) | 17.2% (151) | 0.58 | (0.37, 0.90)  | 0.015  |
| With concomitant use of insulin                 | 43.9% (417) | 60.3% (277) | 0.90 | (0.66, 1.21)  | 0.471  |
| Without concomitant use of SU                   | 28.6% (413) | 45.0% (371) | 0.73 | (0.55, 0.95)  | 0.021  |
| With concomitant use of SU                      | 32.4% (373) | 45.6% (57)  | 0.77 | (0.47, 1.28)  | 0.310  |
| Without concomitant use of remdesivir           | 24.2% (579) | 37.5% (307) | 0.88 | (0.66, 1.16)  | 0.362  |
| With concomitant use of remdesivir              | 47.8% (207) | 64.5% (121) | 0.40 | (0.27, 0.59)  | <0.001 |
| Without concomitant use of interferon-β-1b      | 18.7% (283) | 26.2% (122) | 0.73 | (0.44, 1.22)  | 0.230  |
| With concomitant use of interferon-β-1b         | 37.0% (503) | 52.6% (306) | 0.76 | (0.57, 1.03)  | 0.075  |
| Without concomitant use of dexamethasone        | 12.8% (445) | 17.3% (173) | 0.39 | (0.26, 0.60)  | <0.001 |
| With concomitant use of dexamethasone           | 53.4% (341) | 63.9% (255) | 0.93 | (0.69, 1.25)  | 0.627  |

#### Haematological dysfunction

|          |             |             |      |              |       |
|----------|-------------|-------------|------|--------------|-------|
| Overall  | 27.5% (745) | 53.4% (388) | 0.77 | (0.55, 1.10) | 0.142 |
| Age ≤ 65 | 19.4% (407) | 40.8% (169) | 0.71 | (0.49, 1.03) | 0.070 |
| Age > 65 | 37.3% (338) | 63.0% (219) | 0.86 | (0.50, 1.47) | 0.564 |
| Male     | 34.3% (399) | 59.4% (207) | 0.79 | (0.51, 1.21) | 0.266 |
| Female   | 19.7% (346) | 46.4% (181) | 0.68 | (0.47, 1.00) | 0.049 |

|                                                 |             |             |      |              |        |
|-------------------------------------------------|-------------|-------------|------|--------------|--------|
| Without invasive mechanical ventilation or ECMO | 27.5% (743) | 52.4% (380) | 0.78 | (0.55, 1.11) | 0.165  |
| With invasive mechanical ventilation or ECMO    | 50.0% (2)   | 100.0% (8)  | NA   | NA           | NA     |
| Without ICU admission                           | 20.2% (660) | 32.3% (260) | 0.82 | (0.54, 1.25) | 0.348  |
| With ICU admission                              | 84.7% (85)  | 96.1% (128) | 0.19 | (0.07, 0.50) | <0.001 |
| Without concomitant use of insulin              | 10.2% (361) | 14.3% (147) | 1.82 | (0.99, 3.33) | 0.053  |
| With concomitant use of insulin                 | 43.8% (384) | 77.2% (241) | 0.67 | (0.41, 1.08) | 0.094  |
| Without concomitant use of SU                   | 24.6% (398) | 53.4% (337) | 0.69 | (0.51, 0.93) | 0.016  |
| With concomitant use of SU                      | 30.8% (347) | 52.9% (51)  | 0.94 | (0.50, 1.75) | 0.828  |
| Without concomitant use of remdesivir           | 20.6% (559) | 44.2% (278) | 0.69 | (0.44, 1.08) | 0.105  |
| With concomitant use of remdesivir              | 48.4% (186) | 76.4% (110) | 0.92 | (0.60, 1.42) | 0.711  |
| Without concomitant use of interferon-β-1b      | 14.4% (271) | 25.0% (116) | 1.10 | (0.69, 1.77) | 0.687  |
| With concomitant use of interferon-β-1b         | 35.0% (474) | 65.4% (272) | 0.70 | (0.46, 1.06) | 0.090  |
| Without concomitant use of dexamethasone        | 4.1% (438)  | 12.0% (166) | 1.00 | (0.56, 1.82) | 0.987  |
| With concomitant use of dexamethasone           | 60.9% (307) | 84.2% (222) | 0.48 | (0.33, 0.70) | <0.001 |

### Coagulopathy

|                                                 |             |             |      |              |       |
|-------------------------------------------------|-------------|-------------|------|--------------|-------|
| Overall                                         | 6.1% (783)  | 15.8% (425) | 0.81 | (0.58, 1.14) | 0.234 |
| Age ≤ 65                                        | 3.4% (417)  | 10.9% (183) | 0.46 | (0.25, 0.85) | 0.013 |
| Age > 65                                        | 9.3% (366)  | 19.4% (242) | 1.03 | (0.67, 1.59) | 0.878 |
| Male                                            | 7.9% (420)  | 19.5% (236) | 0.89 | (0.58, 1.34) | 0.565 |
| Female                                          | 4.1% (363)  | 11.1% (189) | 0.67 | (0.37, 1.23) | 0.194 |
| Without invasive mechanical ventilation or ECMO | 5.9% (777)  | 15.4% (416) | 0.83 | (0.58, 1.18) | 0.291 |
| With invasive mechanical ventilation or ECMO    | 33.3% (6)   | 33.3% (9)   | 0.17 | (0.03, 1.02) | 0.052 |
| Without ICU admission                           | 2.9% (682)  | 4.7% (278)  | 1.35 | (0.71, 2.58) | 0.357 |
| With ICU admission                              | 27.7% (101) | 36.7% (147) | 0.58 | (0.37, 0.92) | 0.020 |
| Without concomitant use of insulin              | 1.6% (369)  | 2.6% (151)  | 1.57 | (0.48, 5.13) | 0.457 |
| With concomitant use of insulin                 | 10.1% (414) | 23.0% (274) | 0.83 | (0.58, 1.18) | 0.307 |
| Without concomitant use of SU                   | 4.4% (412)  | 15.8% (368) | 0.55 | (0.35, 0.87) | 0.011 |
| With concomitant use of SU                      | 8.1% (371)  | 15.8% (57)  | 1.49 | (0.83, 2.66) | 0.179 |
| Without concomitant use of remdesivir           | 4.0% (579)  | 13.4% (306) | 0.79 | (0.48, 1.31) | 0.358 |
| With concomitant use of remdesivir              | 12.3% (204) | 21.8% (119) | 0.77 | (0.45, 1.29) | 0.317 |
| Without concomitant use of interferon-β-1b      | 2.8% (283)  | 12.4% (121) | 0.45 | (0.20, 0.98) | 0.043 |
| With concomitant use of interferon-β-1b         | 8.0% (500)  | 17.1% (304) | 0.98 | (0.67, 1.45) | 0.935 |
| Without concomitant use of dexamethasone        | 2.2% (445)  | 4.0% (173)  | 1.50 | (0.62, 3.59) | 0.367 |
| With concomitant use of dexamethasone           | 11.2% (338) | 23.8% (252) | 0.70 | (0.48, 1.03) | 0.067 |

### Hepatic inflammation

|                                                 |             |             |      |              |        |
|-------------------------------------------------|-------------|-------------|------|--------------|--------|
| Overall                                         | 23.0% (738) | 47.3% (383) | 0.50 | (0.38, 0.65) | <0.001 |
| Age ≤ 65                                        | 20.4% (393) | 40.5% (168) | 0.49 | (0.32, 0.75) | 0.001  |
| Age > 65                                        | 26.1% (345) | 52.6% (215) | 0.50 | (0.30, 0.85) | 0.012  |
| Male                                            | 25.8% (387) | 50.2% (205) | 0.45 | (0.32, 0.63) | <0.001 |
| Female                                          | 19.9% (351) | 43.8% (178) | 0.56 | (0.37, 0.84) | 0.006  |
| Without invasive mechanical ventilation or ECMO | 23.0% (735) | 47.1% (382) | 0.52 | (0.40, 0.67) | <0.001 |
| With invasive mechanical ventilation or ECMO    | 33.3% (3)   | 100.0% (1)  | NA   | NA           | NA     |
| Without ICU admission                           | 16.8% (661) | 28.5% (270) | 0.49 | (0.35, 0.68) | <0.001 |
| With ICU admission                              | 76.6% (77)  | 92.0% (113) | 0.15 | (0.07, 0.33) | <0.001 |

|                                            |             |             |      |              |        |
|--------------------------------------------|-------------|-------------|------|--------------|--------|
| Without concomitant use of insulin         | 12.2% (360) | 12.2% (148) | 1.02 | (0.52, 1.98) | 0.959  |
| With concomitant use of insulin            | 33.3% (378) | 69.4% (235) | 0.38 | (0.23, 0.61) | <0.001 |
| Without concomitant use of SU              | 18.5% (395) | 48.0% (331) | 0.47 | (0.35, 0.64) | <0.001 |
| With concomitant use of SU                 | 28.3% (343) | 42.3% (52)  | 0.54 | (0.32, 0.91) | 0.022  |
| Without concomitant use of remdesivir      | 18.6% (554) | 39.3% (280) | 0.48 | (0.35, 0.68) | <0.001 |
| With concomitant use of remdesivir         | 36.4% (184) | 68.9% (103) | 0.49 | (0.31, 0.77) | 0.003  |
| Without concomitant use of interferon-β-1b | 10.7% (270) | 22.4% (116) | 0.47 | (0.29, 0.76) | 0.002  |
| With concomitant use of interferon-β-1b    | 30.1% (468) | 58.1% (267) | 0.49 | (0.34, 0.70) | <0.001 |
| Without concomitant use of dexamethasone   | 9.0% (434)  | 15.4% (169) | 0.58 | (0.32, 1.04) | 0.067  |
| With concomitant use of dexamethasone      | 43.1% (304) | 72.4% (214) | 0.31 | (0.20, 0.47) | <0.001 |

### Hyperinflammatory syndrome

|                                                 |             |             |      |              |        |
|-------------------------------------------------|-------------|-------------|------|--------------|--------|
| Overall                                         | 48.8% (705) | 64.3% (353) | 0.71 | (0.53, 0.95) | 0.021  |
| Age ≤ 65                                        | 46.2% (385) | 52.9% (157) | 0.74 | (0.53, 1.03) | 0.072  |
| Age > 65                                        | 51.9% (320) | 73.5% (196) | 0.70 | (0.41, 1.19) | 0.183  |
| Male                                            | 56.7% (372) | 68.3% (183) | 0.63 | (0.45, 0.88) | 0.008  |
| Female                                          | 39.9% (333) | 60.0% (170) | 0.75 | (0.51, 1.10) | 0.138  |
| Without invasive mechanical ventilation or ECMO | 48.8% (705) | 64.2% (352) | 0.71 | (0.54, 0.95) | 0.021  |
| With invasive mechanical ventilation or ECMO    | NA(0)       | 100.0% (1)  | NA   | NA           | NA     |
| Without ICU admission                           | 43.9% (636) | 51.0% (255) | 0.72 | (0.54, 0.96) | 0.027  |
| With ICU admission                              | 94.2% (69)  | 99.0% (98)  | 0.14 | (0.02, 1.04) | 0.055  |
| Without concomitant use of insulin              | 32.9% (350) | 31.3% (144) | 0.88 | (0.60, 1.29) | 0.509  |
| With concomitant use of insulin                 | 64.5% (355) | 87.1% (209) | 0.65 | (0.37, 1.15) | 0.133  |
| Without concomitant use of SU                   | 46.1% (380) | 63.5% (304) | 0.84 | (0.64, 1.10) | 0.202  |
| With concomitant use of SU                      | 52.0% (325) | 69.4% (49)  | 0.54 | (0.31, 0.94) | 0.030  |
| Without concomitant use of remdesivir           | 42.7% (534) | 54.7% (258) | 0.85 | (0.62, 1.17) | 0.312  |
| With concomitant use of remdesivir              | 67.8% (171) | 90.5% (95)  | 0.21 | (0.11, 0.40) | <0.001 |
| Without concomitant use of interferon-β-1b      | 36.6% (262) | 37.8% (111) | 1.32 | (0.89, 1.96) | 0.169  |
| With concomitant use of interferon-β-1b         | 56.0% (443) | 76.4% (242) | 0.49 | (0.32, 0.76) | 0.002  |
| Without concomitant use of dexamethasone        | 27.5% (426) | 30.2% (162) | 0.67 | (0.46, 0.96) | 0.032  |
| With concomitant use of dexamethasone           | 81.4% (279) | 93.2% (191) | 0.45 | (0.25, 0.81) | 0.008  |

Note: CI = confidence interval; Ct = cycle threshold; ECMO = Extracorporeal membrane oxygenation; OR = odds ratio; ICU = Intensive Care Unit; IgG = Immunoglobulin G; SU = Sulfonylureas

† OR >1 (or <1) indicates metformin group was associated with better (worse) clinical improvement, higher proportions of hospital discharge or recovery, higher (lower) risk of composite outcomes, compared to the control group
